# Supplementary material for: Spatiotemporal analysis of flash flooding events in mountainous areaof China during 1950–2015
Source: Copernicus journal article supplement (doi:10.5194/nhess-2019-150), 2019-07-08
Supplement: Supplementary file [file nhess-2019-150-AC1-supplement.zip]

Statistical Sspatiotemporal analysis of flash flooding events in mountainous-area-of China during 1950–2015

Nan Wang<sup>1,2</sup>, Weiming Cheng<sup>1,2,3,4</sup>, Min Zhao<sup>1,4,5</sup>, Qiangyi Liu<sup>1,2</sup>, Jing Wang<sup>6</sup>, Dongcheng Liu<sup>6</sup>

<sup>1</sup> State Key Laboratory of Resources and Environmental Information Systems, Institute of Geographic Sciences and Natural Resources Research, Chinese Academy of Sciences, Beijing, 100101, China

<sup>2</sup> University of Chinese Academy of Sciences, Beijing, 100049, China

<sup>3</sup> Jiangsu Center for Collaborative Innovation in Geographic Information Resource Development and Application, Nanjing, 210023, China

<sup>4</sup> Collaborative Innovation Center of South China Sea Studies, Nanjing, 210093, China

<sup>5</sup> School of Geographic and Oceanographic Sciences, Nanjing University, Nanjing, 210023, China

<sup>6</sup> Research Institute of Exploration and Development Dagang Oil Field, Tianjin, 300280, China

Correspondence to: Weiming Cheng (chengwm@lreis.ac.cn)

**Abstract.** Flash flooding is one of the most destructive natural disasters that occur in mountainous areas. Understanding the spatiotemporal characteristics of flash flooding across China is important for enabling better disaster estimation and prevention on the national scale. To bridge the gap in the research of the spatiotemporal characteristics of flash flooding events (FFE)s, based on the longest time series of FFEs in China, this paper used Mann-Kendall (MK) test, wavelet analysis, monthly frequency and index of dispersion (D) to detect the temporal variation, temporal periodie and temporal clustering of FFEs in China. The results indicated that: (1) A marked rising in the number of FFEs in China was detected, with a growth rate of 25.6323.62 per year since 1950; (2) On the large scale, the main periodicity characteristics was approximately 12–25a, with three oscillation periods, and tended to be stable since 1980; On the small scale, the 2–8a time scale was prominent, with two oscillation periods, and tended to be stable since 2006 EP, SEM and SWM follows the similar evolution periodic pattern, while, NCP, NWB and TP showed the diverse variation periods respectively; (3) The intra-annual frequency distribution of FFEs can be divided into three types, right-skew, left-skew and symmetry; (4) The inter-annual clustering played the dominant role in FFEs occurrence across China, while the under-dispersions were only detected in six (5%) watersheds. Precipitation anomalies and soil moisture were detected to have a close correlation with FFEs, however, the interplay of climatic variations and anthropogenic activities may impose greatly impacts on the occurrence and evolution of the flash flooding disasters on a large extent. This study provided a preliminary reference for revealing the driving factors of flash flooding disasters in the context of climate change.

1 Introduction

Flash flooding is one of the most destructive natural disasters that occur in mountainous areas due to the top ranking of such events among natural disasters in terms of the people affected and the property losses regionally and globally (Borga et al.,

2011). Flash flooding disasters are triggered by high-intensity and short-duration rainfall, often of a spatially confined convective origin (Saharia et al., 2017; Smith and Smith, 2015). According to the report by the Ministry of Water Resources of China (MWRC), up to 72.4% of flood-related deaths are attributed to flash flooding that occurs in mountainous areas (MWRC, 2014). Flash flooding disaster is expected to increase in frequency and severity, through the impacts of global change on climate, severe weather in the form of heavy rainfall and river discharge conditions (Beniston et al., 2011; Kleinen and Petschel-Held, 2007). Consequently, flash flooding mitigation in mountainous areas is an important part of public safety management and social development (Borga et al., 2011).

Despite the significant threats posed by flash flooding, there is a lack of research into the temporal characteristics of flash flooding on the national scale. Most previous studies related to the multivariate frequency analysis of extreme events assumed temporal stationarity. Several recent studies show that flash flooding characteristics exhibit nonstationary behavior due to climate change, urbanization, land-use change, or water resource structures (Liu and Zhang, 2017; Zhang et al., 2018). A obvious upward trend in flood was driven by increasing precipitation and atmospheric circulation in Germany (Petrov and Merz, 2009). The significant downward trends in the annual maximum flooding in southeast and southwest Australia was found to be associated with the El Niño Southern Oscillation (ENSO) (Ishak et al., 2013). By compiling a new dataset, which consists of the longest available flow series from across Europe, the spatial and temporal clustering of flood events across the Europe was studied (Mediero et al., 2015). Based on a pan-European database, the patterns of change in flood timing were detected in six regions all over Europe in the past five decades (Blöschl et al., 2017). In China, the changing flood frequency across the Pearl River basin has been evaluated in the period of 1951–2014 (Zhang et al., 2018). However, few studies have been focused on the spatiotemporal changing of flash flooding on the national scale in China.

Temporal clustering of flash flooding may have considerable consequences for flash flooding estimation, flash flooding design and risk management (Merz et al., 2016), what's more, clustering of catastrophic events is an important issue for the insurance industry when modelling the pricing of insurance contracts (Khare et al., 2015). Hence, it is of utmost importance to understand not only if clustering exists but how clustering changes with the time scale. Flash flooding clustering is typically explained by linkages between flash flooding frequency or magnitude and climate. There are well-organized modes of inter-annual, inter-decadal and lower-frequency climate variability (Barnston and Livezey, 1987). Non-parametric tests are particularly suitable for flash flooding series, as hydrological data are usually non-normal distributed and serially correlated (Kundzewicz and Robson, 2004). Moreover, they are more robust to outliers and do not require any assumption related to the distribution (Hamed and Rao, 1998). A better understanding of the flash flooding intra annual clustering and hence the most probable flash flooding generation processes can therefore assist in the identification of homogeneous regions with a dominant flash flooding season (Hall and Blöschl, 2018). Nevertheless, the huge diversity of China brings about the spatial heterogeneity in the spatial and temporal characteristics of flash flooding, which hinders people the better flash flood estimation and forecasts on the national scale.

First-hand information obtained from hazard observations is the basis for any kind of scientific study and assessment (Wirtz et al., 2014). In this study, the spatiotemporal series dataset, which is consist of the longest available records, has been compiled

to help address the need for national flash flooding information based on the national investigation held by China Institute of Water Resources and Hydropower Research (IWHR) for the first time (Liu et al., 2018). For the huge diversity of China, the spatial and temporal characteristics of flash flooding were analyzed within six geomor-regions respectively. Based on the flash flooding events dataset, the temporal trending, temporal period and temporal clustering were analyzed in details, together with the correlation between FFEs and climatic indicators to reveal the potential indicators in the context of climate change. To our best knowledge, seasonal and annual characteristics of flash flooding events over China have been mapped for the first time. In this study, we address this gap in knowledge through our analysis of the flash flooding evolution in the past 60 years in the entire China.

The paper is organized as follows. We first (Section 2) introduced the datasets used in this study. We then (Section 3) described the method used to detect the trending of FFEs in China. This is followed (Section 4) by the analysis of spatiotemporal characteristics of FFEs, including temporal variation, temporal trendingmutation, temporal periodie, and temporal clustering. We finally (Section5) discussed the typical variations and potential impacts of FFEs trending.

2 Datasets

2.1 Flash flooding events inventory

The flash flooding events (FFE) in China for the period of 1950–2015 were provided by the National Flash Flooding Disaster Investigation and Evaluation Project. The project was conducted on a national scale in China by data collection, field investigation and information checking. The FFEs records (occurrence time and location) were collected from the multiple sources, including local chronicles and local Bulletin of flood and drought disasters in China, database released by MWRC and official documents issued by local governmental departments. For further obtaining the specific spatial information (longitude and latitude), some field survey work on the historical flash flooding traces have been done at the watershed scale throughout the country. The FFEs analysed in this paper included the water floods, debris flows and landslides etc., which occurred in the mountainous area and caused the economic losses or the people death. In addition, we have deleted the repeated FFEs to ensure that they are recorded only once in the same small watershed (with an area less than 50 km<sup>2</sup>) at the same date.

To the best of our knowledge, this inventory is the first dataset focusing on the national flash flooding disasters in China, which consists of the longest available temporal records. In this study, we selected the FFEs with the full date records in the form of year-month-day since 1950, and eventually, more than 40,000 events were used for subsequent research (Figure 1).

Table 1 The data aggregation used for different analyses

| Section                         | Data                                                                                     |
|---------------------------------|------------------------------------------------------------------------------------------|
| 4.1 Temporal variation analysis | the number of FFEs in each geomor-region at each year during 1950-2015                   |
| 4.2 Temporal trending analysis  | the number of FFEs in each watershed of six geomor-regions at each year during 1950-2015 |
| 4.3 Temporal period analysis    | the number of FFEs at each year during 1950-2015                                         |

设置了格式: 上标

带格式的: 居中, 定义网格后不调整右缩进, 行距: 多倍行距 1.25 字行, 不调整西文与中文之间的空格, 不调整中文和数字之间的空格, 不对齐到网格

设置了格式: 字体: 小五, 加粗, 字体颜色: 着色 5

带格式表格

|                                                            |                                                                                                           |
|------------------------------------------------------------|-----------------------------------------------------------------------------------------------------------|
| <a href="#">4.4.1 Intra-annual clustering</a>              | <a href="#">the number of FFEs in each watershed of six geomor-regions in each month during 1950-2015</a> |
| <a href="#">4.4.2 Inter-annual clustering</a>              | <a href="#">the number of FFEs in each watershed of six geomor-regions at each year during 1950-2015</a>  |
| <a href="#">5.1 Potential factors of the FFEs trending</a> | <a href="#">the number of FFEs in each watershed of six geomor-regions during 1950-2015</a>               |
| <a href="#">5.2 Typical peaks of the FFEs trending</a>     | <a href="#">the location of FFEs in China at 1998 and 2010</a>                                            |

95 **2.2 Geomorphologic regionalization**

Geomorphologic regionalization (geomor-region) is foundational within studies on the spatial differentiation of natural environments, which is an important component within regional geomorphology research. Geomorphologic regionalization data were obtained from China’s State Key Laboratory of Resources and Environmental Information Systems (LREIS). Accordingly, based on the regional differentiation of essential geomorphologic types and their genesis, the entire country has  
100 been divided into six major geomor-regions (Table 24, Figure 1).

**Table 24** Description of the six geomorphologic regionalization (geomor-regions) in China

| Name                                             | Abbreviation | Description                                                                                                                                                                                                                                                                                                                                                                                                                                                                                                                                                                                                                                                                                |
|--------------------------------------------------|--------------|--------------------------------------------------------------------------------------------------------------------------------------------------------------------------------------------------------------------------------------------------------------------------------------------------------------------------------------------------------------------------------------------------------------------------------------------------------------------------------------------------------------------------------------------------------------------------------------------------------------------------------------------------------------------------------------------|
| Eastern Hilly Plains                             | EP           | It located in the northern part of China comprising low terrains and the largest plain areas. Plains and platforms are dominant features of this region, which has well-developed fluvial accumulation landforms. <a href="#">Major rivers in this region include Songhua River watershed, Tumen River watershed, Huai River watershed, etc. The flash floodings in Songhua River watershed are mostly caused by the heavy storm, 80% of the flash floodings occur in July-August, especially in August. The flash floodings in Huai River watershed can be caused by Meiyu and heavy storm, and the flash floodings are generally concentrated in June-September of the flood season.</a> |
| Southeastern Low-middle Mountains                | SEM          | It located in the southern part of the low terrain topography and is dominated by low elevation hills and low or middle relief mountains, with only 30% of its area occupied by plains and platforms. <a href="#">Major rivers in this region include middle and lower reaches of Yangtze River watershed, Poyang Lake watershed, etc. The flash floodings are the most frequent and serious in middle and lower reaches of Yangtze River watershed, because of the Meiyu and heavy storm.</a>                                                                                                                                                                                             |
| Northern and Central Middle Mountains and Plains | NCP          | It located in the northeastern part of China’s middle terrain topography and is characterized by a plateau landform composed of low or middle relief mountains, hills, platforms, and plains. The loess landform is well developed in this region. <a href="#">Major rivers in this region include the middle reaches of Yellow River watershed, Wei River watershed, etc. Ice flood is easily caused by ice jams, ice dams, etc. in the middle and lower reaches of the Yellow River from December to March. The flash floodings also concentrate in late July to early August causing by the heavy storm.</a>                                                                            |

带格式表格

设置了格式: 字体: (中文)+中文正文(宋体), (中文) 中文(中国)

|                                                   |     |                                                                                                                                                                                                                                                                                                                                                                                                                                                                                                                                                                                                                                                                                                                                                                                                                                                                                                                                                                                                                                                                                                                                                                                                                                                                                                                                                                                                                                                                                                                                                       |
|---------------------------------------------------|-----|-------------------------------------------------------------------------------------------------------------------------------------------------------------------------------------------------------------------------------------------------------------------------------------------------------------------------------------------------------------------------------------------------------------------------------------------------------------------------------------------------------------------------------------------------------------------------------------------------------------------------------------------------------------------------------------------------------------------------------------------------------------------------------------------------------------------------------------------------------------------------------------------------------------------------------------------------------------------------------------------------------------------------------------------------------------------------------------------------------------------------------------------------------------------------------------------------------------------------------------------------------------------------------------------------------------------------------------------------------------------------------------------------------------------------------------------------------------------------------------------------------------------------------------------------------|
| Northwestern Middle and High Mountains and Basins | NWB | <p>It located in the northwestern part of the middle terrain topography. It is composed of middle to high mountains, with flattened basins interposed between them, and is characterized by an arid desert geomorphology. Mountains with basins are made up of plains, platforms, and hills. <u>Major rivers in this region include Tarim River watershed, Ili River watershed, etc. The flash floodings in this region can be caused by the local heavy storm or the combination of heavy storm and snowmelt.</u></p> <p>It located in the southern part of the middle terrain topography. Evidencing a typical karst landform, middle or high mountains with middle or high reliefs are widespread with wide valley basins interspersed between them. <u>Major rivers in this region include the upper and middle reaches of Yangtze River watershed, Jialing River watershed, etc. Influenced by the plateau monsoon climate, storms period in this region is long and the rainstorm is usually multi-peak.</u></p> <p>It covers China's high terrain topography. It is composed of plains and high mountains at elevations above 4000 m, accounting for three-fourths of the area of this region. It is characterized by glacial and periglacial landforms. <u>Major rivers in this region include the Yarlung Zangbo River watershed, Nu River watershed, Shiquan River watershed, etc. Local persistent heavy rain is the main cause of flash floodings in the tributaries of the middle reaches of the Yarlung Zangbo River watershed.</u></p> |
| Southwestern Subalpine Mountains                  | SWM |                                                                                                                                                                                                                                                                                                                                                                                                                                                                                                                                                                                                                                                                                                                                                                                                                                                                                                                                                                                                                                                                                                                                                                                                                                                                                                                                                                                                                                                                                                                                                       |
| Tibetan Plateau                                   | TP  |                                                                                                                                                                                                                                                                                                                                                                                                                                                                                                                                                                                                                                                                                                                                                                                                                                                                                                                                                                                                                                                                                                                                                                                                                                                                                                                                                                                                                                                                                                                                                       |

设置了格式: 字体: (中文)+中文正文 (宋体), (中文) 中文(中国)

设置了格式: 字体: (中文)+中文正文 (宋体), (中文) 中文(中国)

设置了格式: 字体: (中文)+中文正文 (宋体), (中文) 中文(中国)

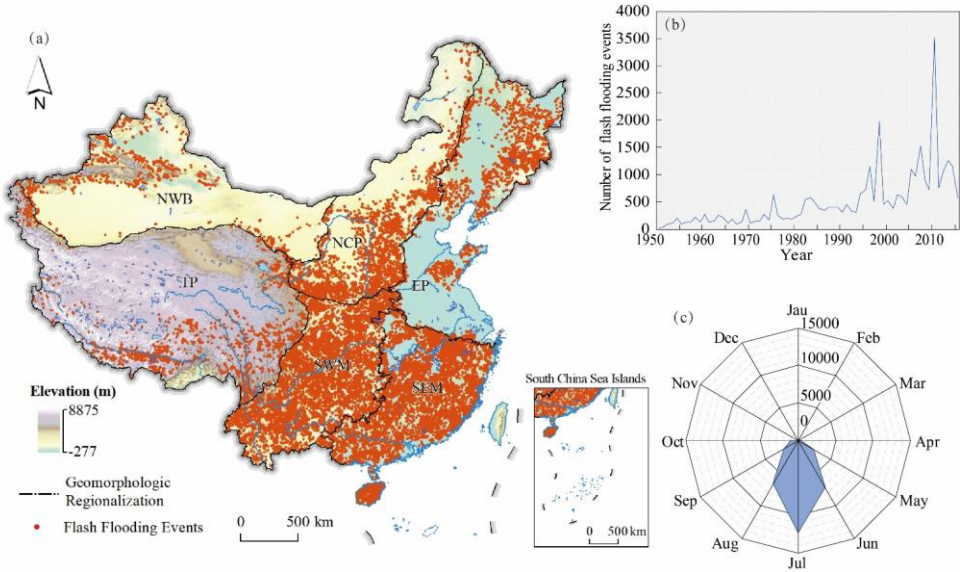

**Figure 1: Location and intra-year and inter-year series of FFEs in China over 1950-2015. (a) the spatial location of the study area and the distribution of FFEs; (b) the intra-year series of the FFEs; (c) the inter-year series of FFEs.**

### 2.3 Watersheds delineation

Watershed was adopted as the basic unit in this study for calculating the temporal ~~variation~~~~mutation~~ and clustering. Based on the third-order stream provided by Resource and Environment Data Cloud Platform (<http://www.resdc.cn/>), the entire study area was divided and merged into 133 watersheds, with the watershed area ranged from 0.3 to  $60 \times 10^4 \text{ km}^2$ .

### 2.4 Climate indicators

The daily precipitation was provided by the China Meteorological Administration (<http://data.cma.cn/>). In this study, only the stations with the complete data from 1980–2010 were selected for further study. CPC Soil Moisture data provided by the NOAA/OAR/ESRL PSD, Boulder, Colorado, USA, from the Web site at <https://www.esrl.noaa.gov/psd/>. The monthly data set consists of a file containing monthly averaged soil moisture water height equivalents. The data is model-calculated and not measured directly.

## 3 Methods

### 3.1 Mann-Kendall test and Sen's slope

The Mann-Kendall (MK) test is a nonparametric test method for identifying the increasing or decreasing pattern of the time series, with the advantage of being insensitive to outliers (Kendall, 1948; Mann, 1945). The MK test method has been widely applied to test the significance of the trends in time series (Donat et al., 2013). The equation is as follows:

$$S = \sum_{i=1}^{n-1} \sum_{j=i+1}^N \text{sign}(X_j - X_i), \quad (1)$$

$$\text{sign}(X_j - X_i) = \begin{cases} 1 & X_j - X_i > 0 \\ 0 & X_j - X_i = 0, \\ -1 & X_j - X_i < 0 \end{cases} \quad (2)$$

where,  $S$  is the MK test statistic,  $X_i$  and  $X_j$  are the values at the time of  $i$  and  $j$  ( $i < j$ ), respectively; and  $N$  is the length of the time series. If a data value from a later time period is higher than a data value from an earlier time period, the statistic  $S$  is incremented by 1. On the other hand, if the data value from a later time period is lower than a data value sampled earlier,  $S$  is decremented by 1. The final value of  $S$  is yielded by the net result of all such increments and decrements (Shahid, 2011). Then, the standard test statistic  $Z$  can be computed from the following formula to evaluate the presence of a statistically significant trend.

$$Z = \begin{cases} (S - 1) / \sqrt{n(n-1)(2n+5)/18} & S > 0 \\ 0 & S = 0, \\ (S + 1) / \sqrt{n(n-1)(2n+5)/18} & S < 0 \end{cases} \quad (3)$$

Where, the Z value is greater than 0, indicating that the time series is on rising, vice versa, if the Z value is less than 0, the time series is decreasing; and if the absolute value of the statistic Z is greater than 1.96, this indicates that the trend in a time series meets the 0.10-05 significance level.

The magnitude of a trend was estimated by the Sen's slope (Sen, 1968). The positive  $\beta$  value represents an increasing trend, while, the negative one means a decreasing trend over the study period. Sen's slope is tested by a ~~significancetwo-tailed~~ test at  ~~$\alpha$  90%~~ confidence level.

$$\beta = \text{median} \left( \frac{X_j - X_i}{j - i} \right) \quad \forall i < j, \quad (4)$$

### 3.2 Wavelet analysis

Wavelet analysis provides a flexible way to reveal the periodic features of a time series in different time scale by decomposing it into a time-frequency space (Torrence and Compo, 1998). The continuous wavelet transform of a signal f is the convolution of f with a set of scaled and translated wavelets, given as:

$$W_f(a, b) = a^{-1/2} \int_{-\infty}^{\infty} f(t) \psi^* \left( \frac{t-b}{a} \right) dt, \quad (5)$$

Where,  $W_f(a, b)$  denotes the wavelet coefficient;  $\psi$  is the mother wavelet function, (here, Morlet wavelet was chosen as the mother wavelet function); \* denotes the complex conjugate; and a, b are the scale and translation parameter.

### 3.3 Monthly frequency

The recorded monthly FFEs frequencies ( $FF_m$ ) can be corrected to account for months with a different number of days (Macdonald and Black, 2010). If no seasonality is assumed, the probability of occurrence of a FFE in a given month is 1/12. Therefore, in a non-seasonal model  $FF_m$  equals 1/12 for any month with upper and lower bounds given by  $L_U^N, L_L^N$  for a significance level of 5% (Cunderlik et al., 2004). ~~However, if a monthly frequency is out of these bounds, FFEs do not follow an annual uniform distribution and a seasonal pattern exists at the 5% significance level.~~

$$FF_m = \frac{F_m}{N} \frac{30}{n_m}, \quad (6)$$

$$L_U^N = \frac{N+11.491}{0.048N^{1.131}}, \quad (7)$$

$$L_L^N = \frac{N-27.832}{0.199N^{0.964}}, \quad (8)$$

Where,  $FF_m$  is the frequency of FFEs in the month m,  $F_m$  is the number of FFEs recorded in the month m, N is the number of FFEs,  $n_m$  is the number of days of month m that, in the case of February, is 28.25 to account for leap years,  $L_U^N$  and  $L_L^N$  are the upper and lower bounds, respectively, for a non-seasonal population of N FFEs that follows a uniform distribution along the year at a significance level of 5%. However, if a monthly frequency is out of these bounds, FFEs do not follow an annual uniform distribution and a seasonal pattern exists at the 5% significance level.

3.4 Index of dispersion

The occurrence of FFEs can be interpreted as a realization of a point process. A point process which occurs randomly in time is a homogeneous Poisson process, i.e. the event occurrence at any time point is independent of the event occurrences at any previous time point. The degree of event clustering and departure from a homogeneous Poisson process can be characterized by the index of dispersion (D) (Mailier et al., 2006). It relates the variability of FFEs counts to the expectation value of the counts:

$$D = \frac{Var(Z(T))}{E(Z(T))} - 1,$$

where, Z(T) is the series of FFEs counts within a time window of length T, Var(Z(T)) is the variance of the FFEs counts and E(Z(T)) is the expected value.

For a homogeneous Poisson, the index of dispersion is equal to zero. Negative values of D stand for under-dispersion and characterize a more regular pattern of FFEs occurrence than a homogeneous Poisson process. Clustering would be indicated by positive D values which stand for over-dispersion.

4 Results

4.1 Temporal variation analysis

In this section, we analysed the large-scale change pattern for the six geomor-regions using the number of FFEs in each geomor-region from 1950 to 2015 based on the 5-year and 10-year moving average of time series. The results showed a marked rising in the number of FFEs in China, with a growth rate of 25.6323.62 per year since 1950. The six geomor-regions showed the similar overall increasing trend, while each geomor-region displayed divergent trending patterns. As the original time series indicated, the number of FFEs reached two obvious peaks at around 1998 and 2010 in all six geomor-regions; EP, SEM and SWM appeared the two significant peaks mentioned above, and showed slight fluctuates in other periods (Figure 2a, 2b, 2e); however, NCP and NWB showed a growth with more nonstationary changes (Figure 2c, 2d); and the number of FFEs in TP increased drastically, especially in the last two decades (Figure 2f). As it revealed in the 5-years and 10-years moving average, intensities in most regions can be divided into two phases, which are 1985–1998 and 2000–2010. NCP and SWM showed a consistent significant increasing trend with the mean change rate at 22.35% and 28.38% per year, respectively; and the mean growth of TP and NWB are 36.6% and 41.26% per year, which showed a steady changing rate; while EP and SEM increased sharply with the mean rate of 79.06% and 68.13% per year. The mean growth of NCP, NWB and TP showed the steady changing rate at 1.86, 1.21 and 1.86 per year, respectively; and EP showed a consistent significant increasing trend with the mean change rate of 3.34 per year; while SEM and SWM increased sharply with the mean rate of 9.32 and 8.05 per year. Additionally, the accumulation number for 1950–2015 indicated that the rates of change in FFEs followed three forms: the increasing of EP and NCP showed the linear pattern; and SEM, NWB and SWM increased at a speeding rate; however, the number of FFEs increased exponentially in TP and NWB.



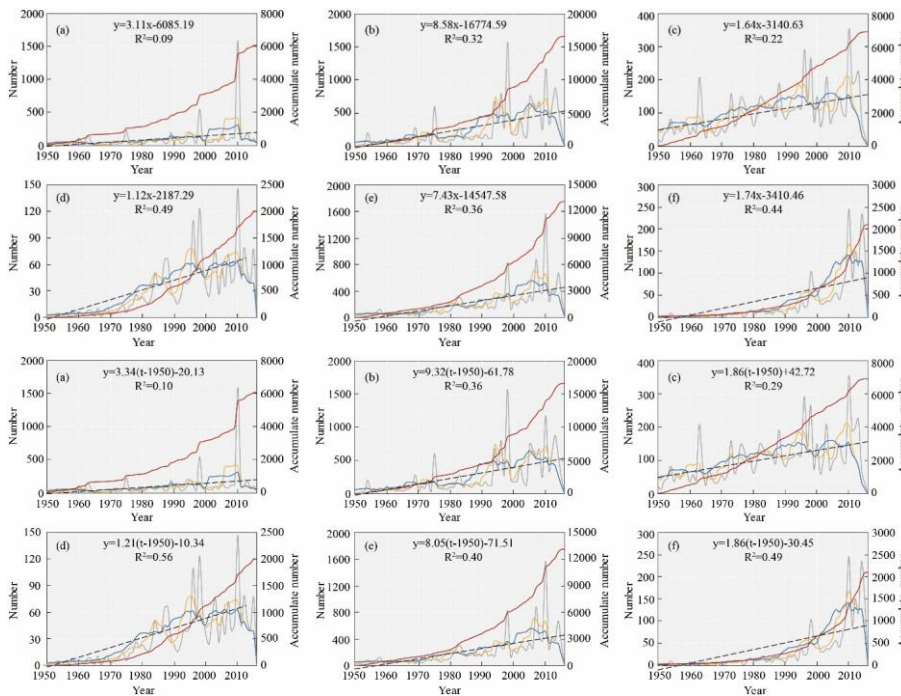

Figure 2: Time series of the annual mean number of FFEs in six geomor-regions of China from 1950 to 2015. The grey line is the original time series; the yellow line and blue line are the 5-year and 10-year moving average of time series, respectively; the red line is the accumulate number of FFEs; and the black dashed line is the trend line based on the least-squares linear regression. (a) EP; (b) SEM; (c) NCP; (d) NWB; (e) SWM; (f) TP.

#### 4.2 Temporal trend analysis

Based on the number of FFEs in each watershed within six geomor-regions from 1950 to 2015, the trends in the time series of FFEs for each of the six geomor-regions were tested by MK testing and the magnitude of a trend was estimated by Sen's slope (Figure 3). In China, 33% of all watersheds showed the significant upward trends (Table 32). The most striking upward trends were detected in the two watersheds located in the southeastern (Z=7.04) and northeastern (Z=7.01) of SWM, while downward trend (Z=-1.28) was only found in the eastern of EP. Significant upward trends (p<0.1) were detected in all geomor-regions, what stands out in Figure 3 was that the most striking concentration of significant upward trends were detected in SWM and SEM, with the percentage of which accounted for 89% and 68% of all watersheds in each geomor-region, respectively (Figure 3). The significant upward trends evenly distributed throughout SWM and located mainly along the southeast coastal area within SEM. In contrast, significant upward trends were only detected in two watersheds (10%), which located in the northwest of NCP. As the results of Sen's slope estimator test, the median of slope values of EP, SEM, NCP, NWB, SWM,

and TP were indicated as 0.37, 2.37, 0.03, 0.23, 2.23, and 0.18, respectively. The statistic results presented an overall agreement between MK testing and Sen's slope estimator in all geomor-regions. The two most obvious increasing was detected in the watershed located in the southern and central of SEM, with the Sen's slope value of 0.5. In all, the watersheds with the strong growth trending were mainly distributed in SWM, and the watersheds showed the strong magnitude but slightly increasing trending were more likely concentrated along the coastal line of SEM.

Table 32 Number (percentage) of watersheds with upward/downward trends in the number of FFEs.

| Region   | EP     | SEM     | NCP    | NWB    | SWM     | TP     | All China |
|----------|--------|---------|--------|--------|---------|--------|-----------|
| Upward   | 4(12%) | 13(68%) | 2(10%) | 5(28%) | 16(89%) | 3(13%) | 44(33%)   |
| Downward | 1(3%)  | 0(0%)   | 0(0%)  | 0(0%)  | 0(0%)   | 0(0%)  | 1(1%)     |

| Region   | EP     | SEM     | NCP    | NWB    | SWM     | TP     | All China |
|----------|--------|---------|--------|--------|---------|--------|-----------|
| Upward   | 4(12%) | 13(68%) | 2(10%) | 5(26%) | 16(89%) | 3(13%) | 44(33%)   |
| Downward | 1(3%)  | 0(0%)   | 0(0%)  | 0(0%)  | 0(0%)   | 0(0%)  | 1(1%)     |
| Total    | 34     | 19      | 20     | 19     | 18      | 23     | 133       |

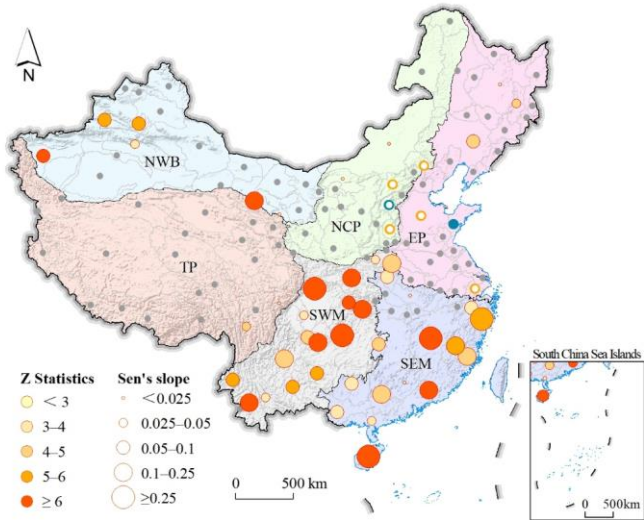

Figure 3: Trends in the annual frequency of FFEs through the MK test and Sen's slope estimation. Where, the blue and yellow solid circles show significant downward and significant upward at a confidence level of 90%; the blue and yellow circles with white holes indicate downward and upward trends that are not satisfied with the confidence interval of 90%; the grey solid circles indicate insignificant trends.

4.3 Temporal periodic analysis

4.3.1 Period scales identification

The real-part of the wavelet coefficient reflects the periodic variation of the sequence of FFEs. Its distribution in the time domain indicates the future change trending of FFEs on different time scales. The time frequency distributions of the real-part of the wavelet transform coefficients of FFEs in China each geomor-region are shown in Figure 4. There are multi-scales variation characteristics in the evolution of FFEs. Among them, EP, SEM and SWM follows the similar evolution periodic pattern, while, NCP, NWB and TP show the diverse variation periods respectively. On the large scale, the main periodicity characteristics in EP, SEM and SWM are approximately 12–25a (here, a referred to one year), with three oscillation periods, and tend to be stable since 1980. The 12–25a periodicity mainly exists in 1995–2000 and 2008–2013, with the most obvious peaks occurred at 1998 and 2010 (Figure 4a, 4b, 4e). On the small scale, the 2–8a time scale in EP, SEM and SWM are prominent, with two oscillation periods, which started to stay stable since 2006. In NCP, the alternative 10–25a periodicity of FFEs can be detected all over the period of 1950–2015, the 8–12a periodicity since 1990s, and the 5–8a periodicity since 2005 (Figure 4c). In NWB, the 10–22a periodicity started since 1975, with four oscillation periods (Figure 4d). However, there is no obvious periodicity can be detected on large scale in TP (Figure 4f).

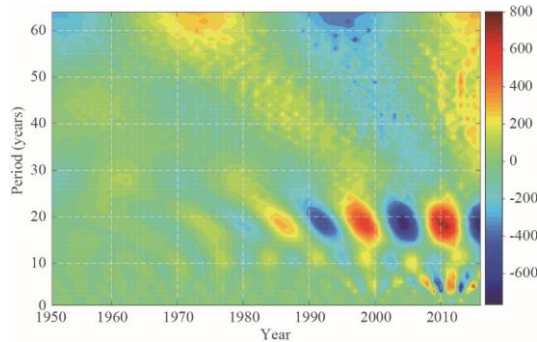

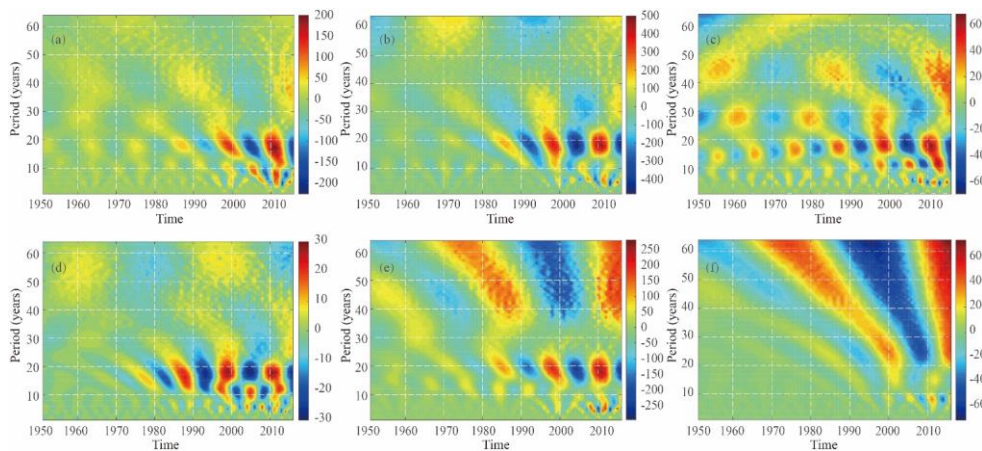

Figure 4: The real part of the wavelet coefficient of FFEs in six geomor- regions of China. (a) EP; (b) SEM; (c) NCP; (d) NWB; (e) SWM; (f) TP.

The modulus of Morlet wavelet coefficients is the reflection of the distribution of energy density corresponding to the period of change of different events in the time domain. The larger the coefficient modulus, the stronger the periodicity of the corresponding time period or scale will be. In Figure 5a, during the evolution of the FFEs in SEM and SWM, the largest time scale of FFEs is 16–22a, indicating that it is the most obvious temporal scale, followed with the period of the 2–6a, which ranked the second place, and the periodic variation were small (Figure 5b, 5e). In NCP, the most significant periodic variation is 10–20a, and the second is 3–5a. In NWB, the obvious temporal scale of 10–20a lasts for the longest period since 1985. The square of the wavelet coefficients is equivalent to the wavelet energy spectrum, which can analyze the oscillation energy of various patterns of the anomalies. Figure 5b shows that the energy of the 16–22a time scale is the strongest and the period is the most significant, but its periodic variation has locality, that is, it is mainly concentrated after 2000. The energy of 2–6a time scale took second place, whose main distribution was after 2010.

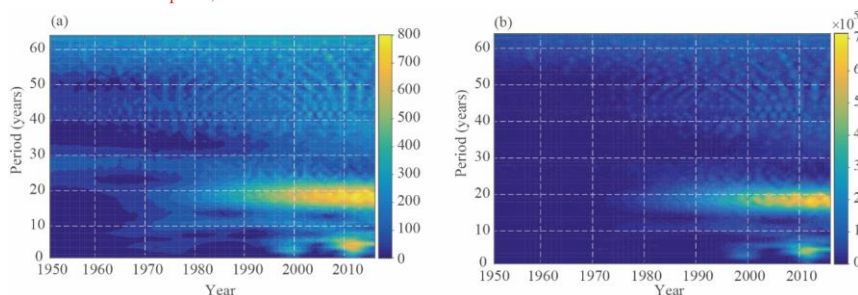

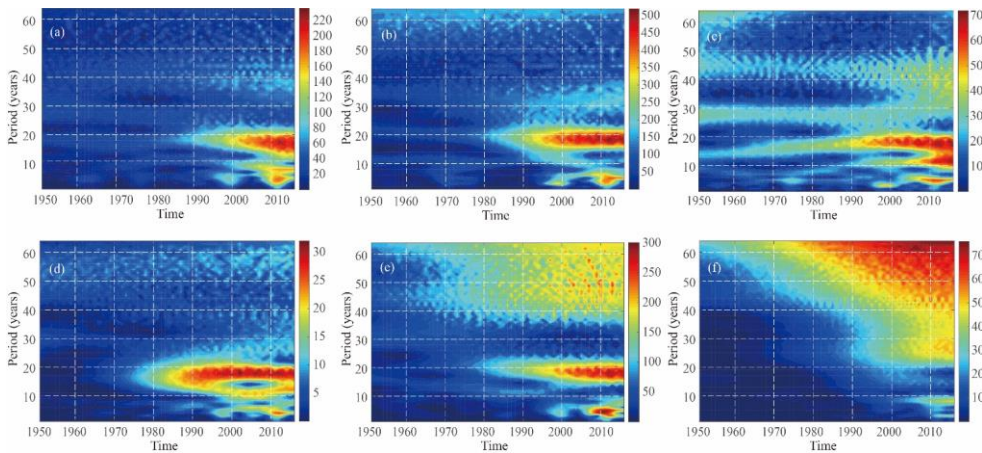

Figure 5: The Morlet wavelet analysis of FFEs. (a) the modulus of wavelet coefficients; (b) the energy spectrum of wavelet. Figure 5: The modulus of wavelet coefficients of FFEs in six geomor-regions of China. (a) EP; (b) SEM; (c); NCP; (d) NWB; (e) SWM; (f) TP.

#### 4.3.2 Periodic component analysis

The wavelet variance map reflects the distribution of the fluctuation energy of the time series of FFEs with different time scales. It can be used to determine the main period out of the evolution of FFEs. In Figure 6, all geomor-regions, except TP, showed the most obvious peak of 18–19a, which indicated the strongest and the first main period of FFEs. On the characteristics temporal scale of 18–19a, the average variation periods of FFEs in EP, SEM, NCP, NWB and SWM are 7–7.5a. Moreover, the second main period of FFEs in EP, SEM and SWM are 5a, and NCP and NWB are 11–12a. However, in TP, the first main period is detected as 26a, and the second one is 8a, there were four obvious peaks, which corresponded to the time scales of 19a, 5a, 11a and 3a, respectively. Among them, the most obvious peak corresponded to the 19a time scale, indicating that the period of 19a is the strongest and the first main period of the FFEs variation, followed by the time scale of 5a, corresponding to the second evolution of FFEs. The fluctuations of the above four cycles controlled the variation characteristics of FFEs in the overall time domain.

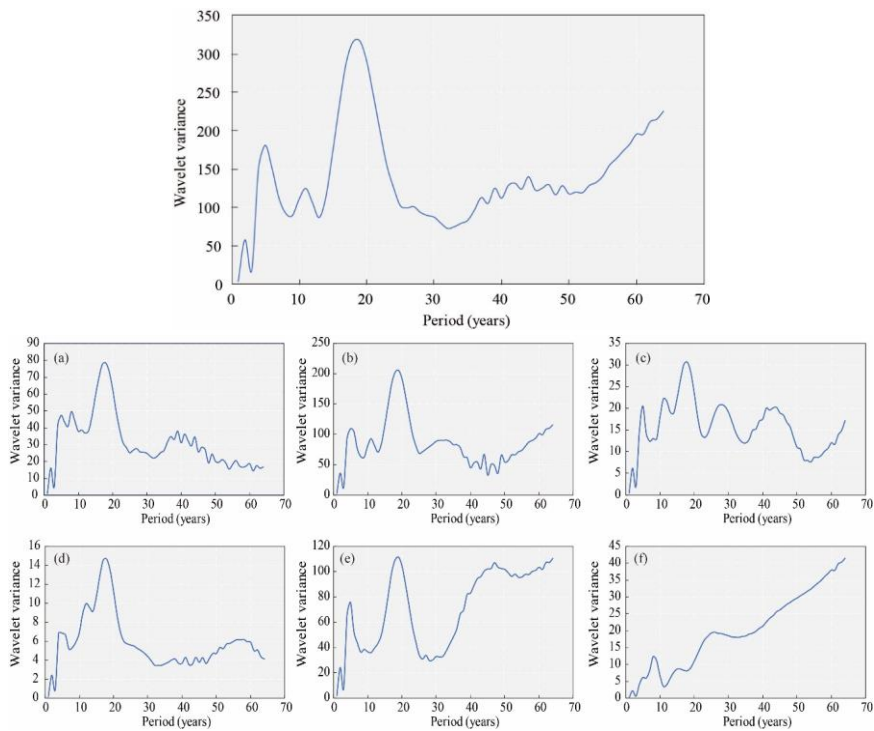

**Figure 6: The wavelet variance analysis of FFEs in six geomor-regions of China. (a) EP; (b) SEM; (c) NCP; (d) NWB; (e) SWM; (f) TP.**

Based on the test results of wavelet variance, the wavelet coefficients of the first and second main periods that control the evolution of FFEs was plotted in Figure7. From the main cycle-trending, the average period of FFEs, that is, the rich-poor variation characteristics, can be analyzed under different time scales (Figure 7a). On the characteristic temporal scale of 19a, the average period of FFEs is about 6 years, and it has experienced about five rich-poor transitional periods. On the characteristic temporal scale of 5a, the average change period of FFEs is about 2 years, which has experienced a rich poor change of 18 cycles (Figure 7b).

设置了格式: 字体: (中文) + 中文正文 (宋体), 字体颜色: 着色 5, (中文) 中文(中国), (其他) 英语(美国)



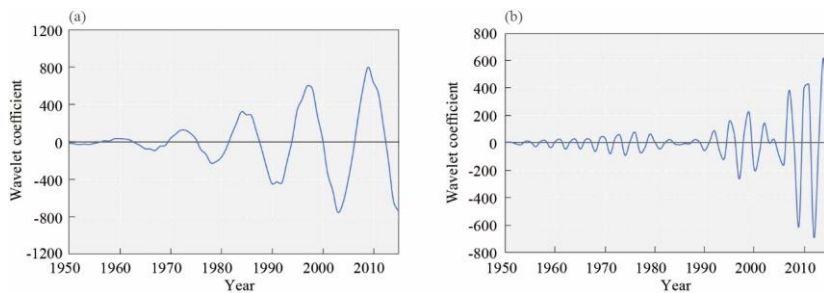

**Figure 7: The wavelet hydrograph in the periodic component of FFEs. (a) on the characteristic temporal scale of 19a; (b) on the characteristics temporal scale of 5a.**

#### 4.4 Temporal clustering detection

##### 4.4.1 Intra-annual clustering

To assess the FFEs-rich or FFEs-poor months within one year, the seasonality pattern of the monthly frequency of FFEs in six geomor-regions were analyzed from their mean values in the period 1950–2015. The proposed method tests the significance of seasons of high and low probability of FFEs occurrences by comparing the observed monthly variability of FFEs occurrences with the theoretical monthly FFEs variability in a nonseasonal model. Figure 78 showed the intra-annual monthly frequency for all watersheds and the areal averaged intra-annual trends for each geomor-region.

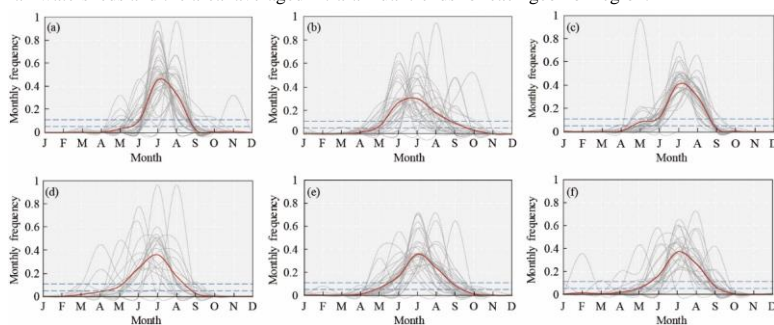

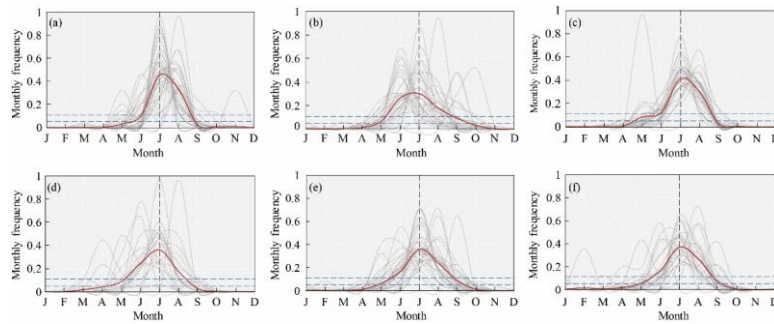

**Figure 78:** Monthly frequency of FFEs in six geomor-regions. ~~Where, the~~ The grey lines are the monthly frequency of the watersheds within each geomor-region; the red line is the mean monthly frequency of each geomor-region; the horizontal blue dashed line is the confidence intervals of 95%, in the case of a non-seasonality pattern. (a) EP; (b) SEM; (c) ~~NCP~~; (d) NWB; (e) SWM; (f) TP.

From the distribution pattern showed in Figure 78 and Table 43, the frequency distribution can be divided into three types, namely, right-skew, left-skew and symmetry. EP, NCP, and TP tend to be right-skew distribution, with the high frequency of FFEs were more likely to appear after July (Figure 7a, 7c, 7f). The intensive consecutiveconvective rainfall in these geomor-regions concentrated in mid to late-summer. SEM and NWBNCP seemed to lean to left, which meanted the FFEs occurred earlier than theJulyother geomor-regions (Figure 7b, 7d). The Meiyu period emerged in June and July along the mid to lower Yangtze River may be closely related to the left-skew of FFEs in SEM. In addition, The snowmelt caused by the increasing temperature in late spring may be the proper reason. SEM and SWM waswere identified as symmetry distribution for the high monthly frequency evenly covering the whole summer (Figure 7e). However, some inconsistencies of intra-annual frequency in the same geomor-region can be detected. In NWB, FFEs occurred in June to August can be detected in most watersheds resulting from the heavy storms; while, some watersheds showed the high FFEs frequency in March to May, for the glaciers and snowmelt causing by the rising temperature. In SWM, the long storm period lasting from June to November and the variable topographic features bring about the diverse FFEs-rich period in different watersheds. In TP, the FFEs mostly likely to appear in June to August, with some peaks scatted in different months for the low frequency of FFEs overall.

**Table 43** FFEs characteristics of six geomor-regions identified in China.

| Region | Flood-rich months | Flood-poor months  | Distribution pattern |
|--------|-------------------|--------------------|----------------------|
| EP     | July; August      | September to May   | Right-skew           |
| NCP    | June to August    | September to April | Left-skew            |
| NWB    | June to August    | September to April | Right-skew           |
| SEM    | June to August    | October to April   | Symmetry             |
| SWM    | June to August    | October to April   | Symmetry             |
| TP     | June to August    | October to April   | Right-skew           |

| Region | Flood-rich months | Flood-poor months | Distribution pattern |
|--------|-------------------|-------------------|----------------------|
| EP     | July, August      | September to May  | Right-skew           |



|            |                       |                           |                   |
|------------|-----------------------|---------------------------|-------------------|
| <u>SEM</u> | <u>June to August</u> | <u>October to April</u>   | <u>Left-skew</u>  |
| <u>NCP</u> | <u>June to August</u> | <u>September to April</u> | <u>Right-skew</u> |
| <u>NWB</u> | <u>June to August</u> | <u>September to April</u> | <u>Left-skew</u>  |
| <u>SWM</u> | <u>June to August</u> | <u>October to April</u>   | <u>Symmetry</u>   |
| <u>TP</u>  | <u>June to August</u> | <u>October to April</u>   | <u>Right-skew</u> |

Trends for the mean value in six geomor-regions showed the similar variation pattern (Figure 89). In EP, only two FFEs-rich months were identified in July and August, while, a longer FFEs-rich season was observed in the other five geomor-regions, which was from June to August. For the FFEs-poor season, there was an obvious division between the three geomor-regions in the north of China (EP, NCP and NWB), and those in the south of China (SEM, SWM and TP). Among them, the FFEs-poor season in EP is the longest, which start from September and end in May. Besides, September to April were detected as the FFEs-poor season in the regions located at high latitudes, when snow accumulates in the watershed and flash floodings occur less frequently. However, the poor seasons of the regions at low latitudes were observed shorter than above, which started from October to April.

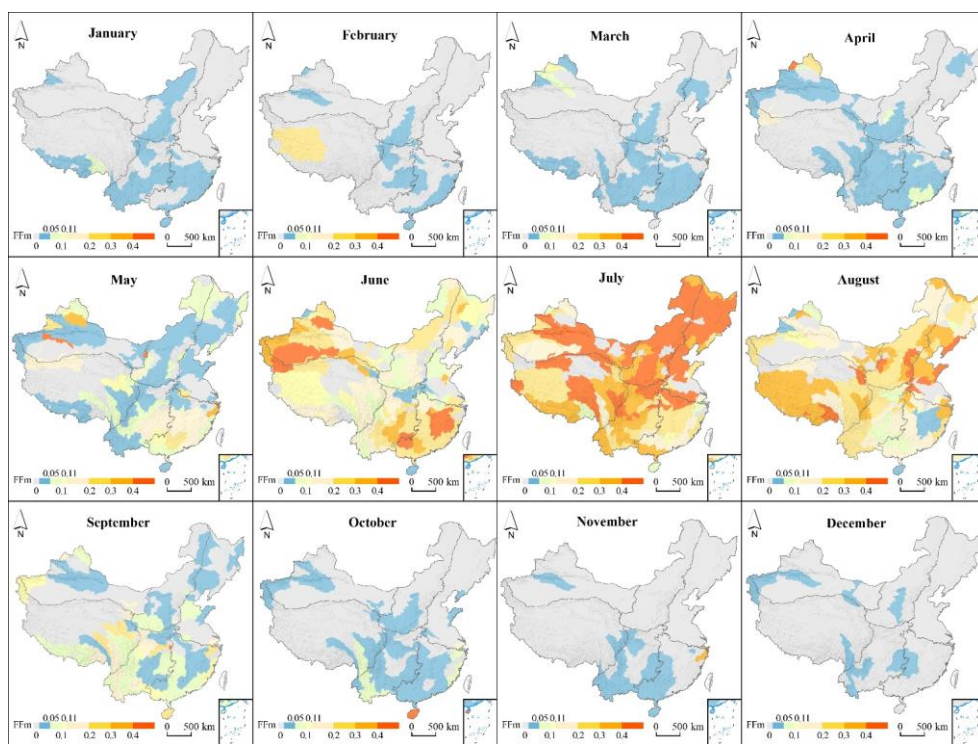

**Figure 89: Maps showing the monthly frequency of FFEs by different months. Where, the color bar represents the monthly FFEs frequency (FFm) for each month; the yellow to red areas are the watersheds with significant FFEs-rich month (FFm larger than 0.11), while the blue areas are the watersheds with significant FFEs-poor month (FFm lower than 0.05).**

#### 4.4.2 Interfa-annual clustering

To examine the inter-annual FFEs clustering, index of dispersion (D) was applied with the FFEs occurrence frequency data. The D larger than 0 was observed in five out of six geomor-regions across China, indicating that the inter-annual clustering played the dominant role in FFEs occurrence (Figure 940). Extensive significant clustering, large D up to 1, can be detected in EP, SEM, and SWM geomor-regions, with the largest one of 3.19 in Hainan Island of SEM, meaning that on average FFEs occur 3.19 times more often in FFEs-rich years than would be expected from the Poisson distribution. The strength of clustering was fading out from east to west of China. Nevertheless, there were six of all watersheds showing statistically significant results in negative D, which indicated that the inter-annual occurrence of FFEs in these watersheds were under-dispersion. In this study, the characteristic under-dispersion a more regular distribution of FFEs occurrence was mainly identified in NCP, SEM, and the junction zone between TP and SWM, which seem to have a more regular temporal pattern among years.

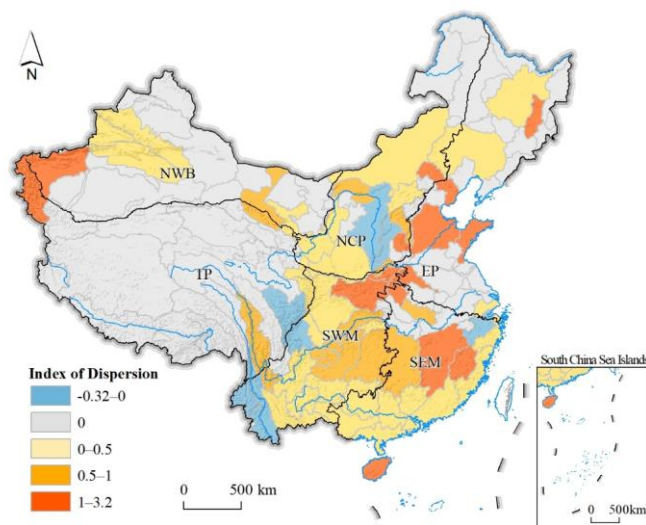

Figure 940: Index of dispersion (D) of FFEs in watersheds for the period of 1950–2015.

## 5 Discussion

The long-term variation trending indicated that the number of FFEs in all six geomor-regions showed relatively low before 1980. On one hand, this variation may be attributed to the poor data acquisition method and the inadequate data records before 1980s, which may result in the lower occurrence in the historical period to some extent. On the other hand, some climate factors, e.g. precipitation, may also have an effect on the FFEs. With the globe changing, the increasing extreme precipitation may cause more and more flash flooding disasters in recent years. To reveal the potential factors of the FFEs trending and better understand the obvious peaks in the FFEs trending, we discussed the potential relationships between climatic factors and FFEs as follows.

### 5.1 Potential ~~factors~~impacts of the FFEs trending

Although the results in this study showed that the characteristics of FFEs had relatively clear regional patterns due to the dominance of climatic controls at regional scale, subsurface properties (i.e., catchment storage) also play a considerable role for the prediction of FFEs, which had not been discussed before. Researchers indicated that climate changing contributed much to the occurrence and magnitude of the hydro-meteorology hazards in recent years (Liu et al., 2019b; Peng et al., 2019; Zhang et al., 2014; Zhao et al., 2010). Among the climate indicators, precipitation and soil moisture are the two prominent factors which may induce the flash flooding. The variation of atmospheric circulations and monsoon activities on the large

带格式的: 正文

scale have great influence on the regional precipitation. The anomalies of atmospheric circulations could be the important reasons for the variability of the intensity and frequency of extreme precipitation in China (Lv et al., 2019; Ma et al., 2018). Soil moisture has an important role in the hydrological cycle, governing the evaporation, runoff, infiltration processes. Therefore, apart from precipitation, the overall soil moisture state of a catchment is another vital factor in the initiation of flash flooding. While, how does the climate indicators influence the flash flooding is still unveiled on the national scale. Among the climate indicators, precipitation and soil moisture are the two prominent factors which may induce the flash flooding. In this paper, we selected the annual total precipitation amount of the rainy days seasonal precipitation with daily precipitation exceeding 90<sup>th</sup> percentile of 1980–2010 daily precipitation (R90p) and the mean soil moisture (SM) of summer (May to August) to detect the potential impacts that may be caused by these indicators.

Figure 1044 showed the scatter plot of R90p and the number of FFEs in each watershed of six geomor-regions, and the significant positive correlations between R90p and FFEs were identified in SEM (Figure 114b) and NWB (Figure 114d) (Figure 10b, 10d). The variation of atmospheric circulations and monsoon activities on the large scale have great influence on the regional precipitation. The anomalies of atmospheric circulations could be the important reasons for the variability of the intensity and frequency of extreme precipitation in China (Lv et al., 2019; Ma et al., 2018). Studies indicated that the East Asia Summer Monsoon (EASM) was one of the key factors of the climate system, which severely influenced the precipitation variation in China (Loo et al., 2015; Zhang, 2015). Additionally, the movement of the rainfall belt was closely connected with the advance and retreat of EASM (Lü et al., 2007; Lu et al., 2013; Qian et al., 2002). SEM and NWB which is located along the Yangtze River, was greatly influenced by the EASM frequently, which are located along the Yangtze River. Usually, EASM appeared in the Yangtze River basin in mid-June, which is called Meiyu period. Meanwhile, the extreme precipitation increased in the mid and lower reaches of the Yangtze River (Huang et al., 2007; Li et al., 2018; Liu et al., 2019a).

Figure 1142 displayed the scatter plot of soil moisture and the number of FFEs in each watershed of six geomor-regions, and the significant positive correlation (with  $R > 0.5$ ,  $p < 0.01$ ) between soil moisture and FFEs was identified only in TP (Figure 1142f). Soil moisture has an important role in the hydrological cycle, governing the evaporation, runoff, infiltration processes. Therefore, apart from precipitation, the overall soil moisture state of a catchment is another vital factor in the initiation of flash flooding. The snow cover over the TP exhibited a positive trend in winter and spring. Thick snow on the Tibetan plateau in winter increases the soil moisture content in summer and weakens the land-sea thermal contrast over East Asia, which causes the weakening of the subsequent EASM circulation (Tian and Fan, 2013; Zhao et al., 2010).

Usually, based on the complex interactions of terrain, soil and other underlying surface features, flash flooding mainly induced by the extreme precipitation with short duration and high intensity. In China, EASM affected most regions (SEM, EP, SWM and southern of NCP) in summer, which makes them showed similar patterns on temporal. However, the local divergence in terrain and soil features contribute to the spatial differentiation in each geomor-region. In SEM, greatly affected by the tropical cyclone, it is easy to form strong surface runoff in red soil along the coastal mountains. The hills and mountains region in SEM are the most prone area to flash flooding in China. Similarly, SWM is the heaviest rainstorm inland region and is well-known for the complex topographic features. Affected by the Plateau Monsoon Climate, the active tectonic and the dissolvable Carbonate provide abundant materials for the formation of debris flow disasters. Specially, due to the complex topographic effects, severe flash flooding disasters often occurred in autumn in the Daba Mts in the northern SWM. In EP, the flash flooding disasters mainly concentrate in two regions, one is the Da Hinggan Mts, Xiao Hinggan Mts, and Changbai Mts of northeastern EP, and another is the Yan-Taihang Mts belt of southeastern EP. Together with the moving of rainfall belt, the FFEs-rich months show some time difference on intra-annual scale from south to north in EP. Another region severely affected by the

monsoon is the Loess Plateau, which is the most widely loess distributed area in the world. The thick loess layer is prone to cause soil erosion, resulting in the broken surface and widespread gullies. Therefore, Loess Plateau is one of the regions with the severe debris flow disasters in China. Besides, blocked by the Himalayas Mts, a large amount of water vapor brought by the Indian Ocean Southwest Monsoon form strong precipitation in southeastern of TP. Thanks to the sparse population distribution in TP, there is little chance to induce serious flash flooding disaster in this region. Moreover, due to the far distance from the ocean, NWB and northern of NCP are hardly affected by monsoon and they are indicated as the regions least affected by the heavy rainstorm. However, the spatial local terrain can also play an important role in the process of flash flooding disaster formation. For example, the trumpet-shaped topography in Ili valley watershed of Tian Mountains has a lifting effect on the water vapor coming from the west, thus forming heavy rainstorm and inducing severe disasters.

设置了格式: 字体: (中文) + 中文正文 (宋体), (中文) 中文(中国)

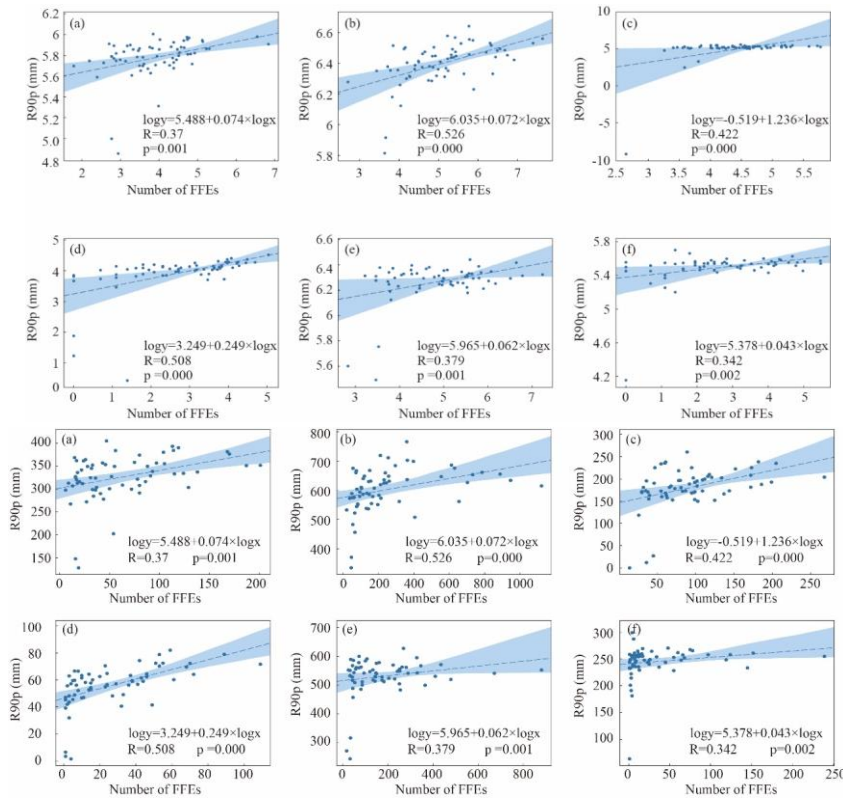

Figure 1044: Relations between R90p and FFEs. Where, R90p indicates the annual total precipitation amount of rainy days with precipitation exceeding 90<sup>th</sup> percentile of 1980-2010 daily precipitation. (a) EP; (b) SEM; (c); NCP; (d) NWB; (e) SWM; (f) TP.

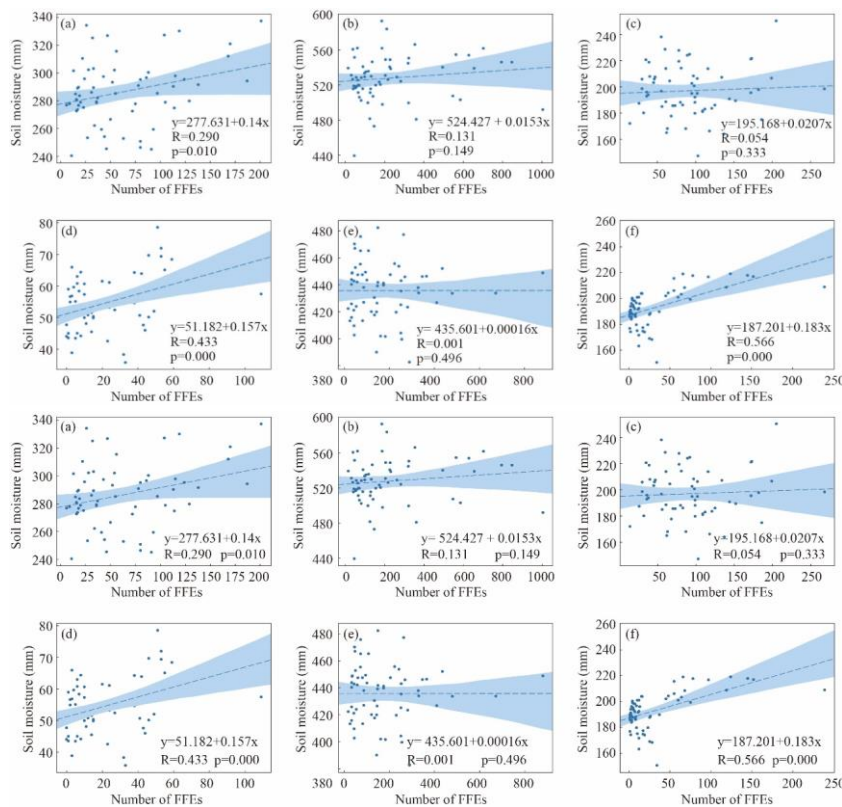

**Figure 1142: Relations between the mean soil moisture of Summer (May–August) and FFEs. (a) EP; (b) SEM; (c); NCP; (d) NWB; (e) SWM; (f) TP.**

## 5.2 Typical peaks of the FFEs trending

In this study, a general increasing trend in frequency of FFEs was detected in the period 1950–2015, with more notable evidence in 2005–2010. Here, two obvious peaks, 1998 and 2010, were closely related to the extreme precipitation in China. To reveal the detailed relation between the extreme precipitation and FFEs in 1998 and 2010, the spatial patterns of these two elements were analyzed. According to the definition given by WMO, the average value of a meteorological element over 30 years is defined as a climatological normal. Therefore, the precipitation anomalies in this study was derived based on the mean precipitation of 1981–2010. Statistics results of the FFEs distributed in the different zones of the precipitation anomalies were listed in Table 54.

设置了格式: 字体: (中文) + 中文正文 (宋体), (中文) 中文 (中国)

**Table 54** Distribution of the number of FFEs within the zone of the precipitation anomalies

| Anomalies of precipitation (%) | 1998 |     |     |     |     |     | 2010 |     |     |     |     |     |
|--------------------------------|------|-----|-----|-----|-----|-----|------|-----|-----|-----|-----|-----|
|                                | May  | Jun | Jul | Aug | Sep | Oct | May  | Jun | Jul | Aug | Sep | Oct |
| <-40                           | 1    | 14  | 25  | 48  | 15  | 2   | 1    | 45  | 22  | 46  | 2   | 1   |
| -40 ~ -20                      | 6    | 9   | 75  | 42  | 13  | 3   | 15   | 21  | 55  | 32  | 2   | 0   |
| -20 ~ 0                        | 30   | 39  | 209 | 29  | 9   | 3   | 22   | 32  | 66  | 54  | 19  | 24  |
| 0 ~ 20                         | 30   | 53  | 143 | 68  | 7   | 0   | 19   | 60  | 130 | 144 | 31  | 170 |
| 20 ~ 40                        | 13   | 60  | 137 | 97  | 4   | 0   | 31   | 65  | 294 | 52  | 24  | 119 |
| 40 ~ 60                        | 6    | 75  | 149 | 57  | 1   | 0   | 28   | 103 | 381 | 28  | 43  | 184 |
| 60 ~ 80                        | 9    | 107 | 133 | 67  | 1   | 1   | 31   | 161 | 457 | 11  | 13  | 283 |
| 80 ~ 100                       | 5    | 231 | 95  | 31  | 2   | 0   | 6    | 92  | 417 | 5   | 11  | 77  |
| ≥100                           | 21   | 239 | 261 | 140 | 0   | 3   | 5    | 110 | 613 | 6   | 25  | 32  |

In 1998, about 80% FFEs located in the zone with precipitation anomalies above 0 (Table 54). In August, the main rainfall belt was located over the Yangtze River, with precipitation 100% and more above normal (Figure 12d). And a typical Secondary Meiyu occurred in August. Tropical and subtropical circulation systems were characterized by a stronger than normal and more westward-extending Western Pacific Subtropical High (WPSH), a weaker than normal EASM, and anomalous convergence of moisture flux in the mid and lower reaches of the Yangtze River. These similar circulation anomalies were attributed to the similar tropical sea surface temperature anomalies pattern in the preceding seasons, i.e., the super El Niño and strong warming in the tropical Indian Ocean (Yuan et al., 2017). The anomalies of precipitation resulted in the rainfall belt moving from lower to upper reaches along the Yangtze river from June to August (Figure 12b, 12c, 12d). However, the FFEs occurred in September and October were not detected in the heavy rainfall centre (with the anomalies of precipitation more than 100%) (Figure 12e, 12f), which indicated there may be other factors together with the precipitation anomalies to induce the flash flooding during this period.

In 2010, more than 90% of the FFEs were distributed in the zone of the precipitation anomalies, with the zone of 60–80% and more than 100% ranking the top two (Table 54). Studies indicated that an El Niño Modoki with strongest warming in the central Pacific was detected, which caused the rainfall belt shifting northward. The extreme precipitation appeared in the Huaihe–Yellow River along with the weaken Indian summer monsoon and strengthen EASM (Wang et al., 2012). The cluster centre of FFEs moved from Yangtze River to Huaihe River to Yellow River from May to July (Figure 12g, 12h, 12i), which showed closely connection with the precipitation anomalies. Studies have indicated that the El Niño Modoki was different from the typical El Niño with respect to its evolution and climate impact (Feng et al., 2011).

The Pacific Decadal Oscillation (PDO) phenomenon presents above the Pacific Ocean with alternating positive (warm) and negative (cold) phases, has a clear impact on the natural disasters as indicated in the studies (Seiler et al., 2012; Xiao et al., 2015; Zhong et al., 2017). The PDO has greatly affected the periodic climate change, resulting in the alternate variation of FFEs-poor and FFEs-rich in China since 1980s. Studies demonstrated that the warm phase of PDO is conducive to lead to the positive precipitation anomalies in eastern China for the period of 1960s–2010s (Zhu et al., 2015; Si, 2016). As the temporal periodic analysis in our study, the 10–20a periodicity of FFEs existed in the period of 1995–2000 and 2008–2013 in most of China. Moreover, El Niño and La Niña induced the alternative of flood and drought has been detected in first main period of 18–19a usually lasts for 7–7.5a, with about four rich-poor oscillations. Moreover, the fluctuation of El Niño and EASM activities also indicate a good correspondence between the variation of FFEs and global climate change in China.



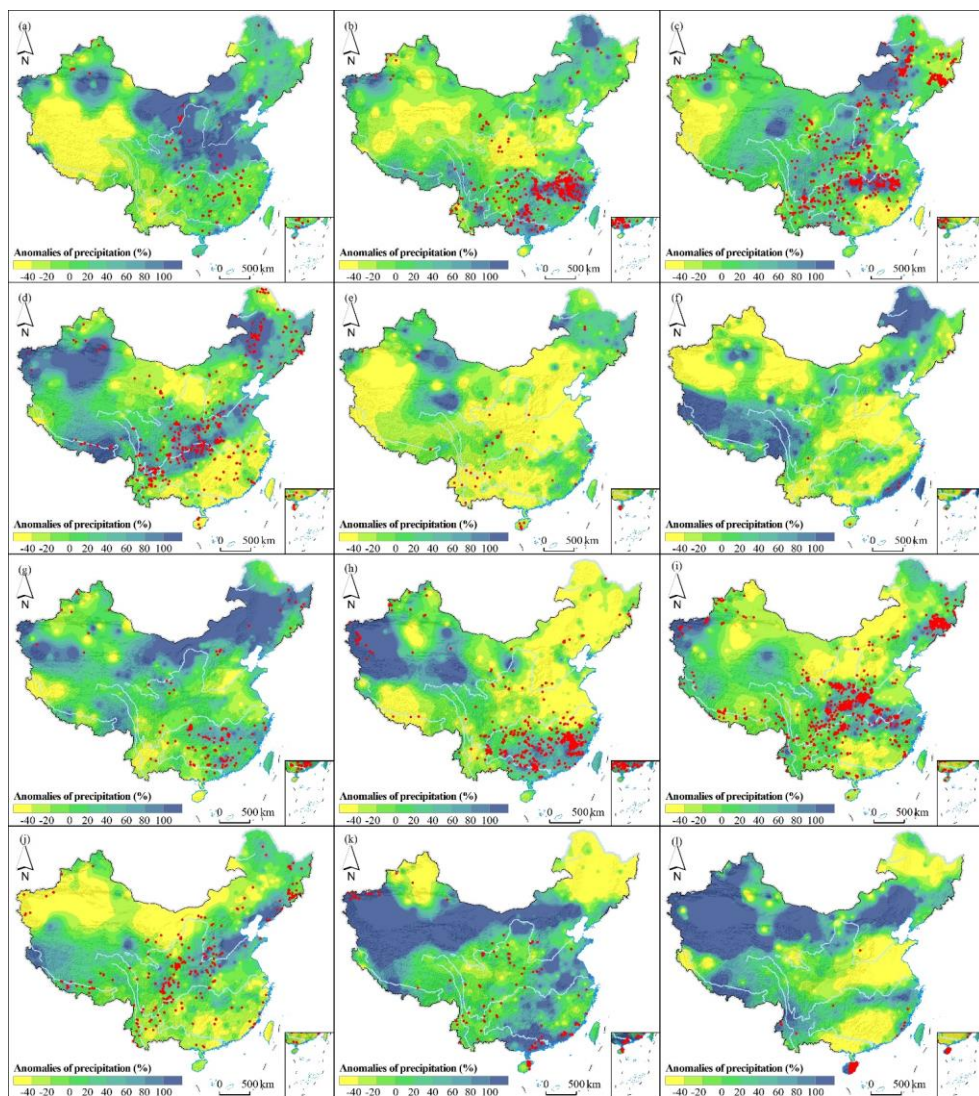

Figure 1213: Percentage anomalies of precipitation averaged in May–August–October. Where, the red points are the location of FFEs. (a–f) May–August–October of 1998; (g–l) May–August–October of 2010.



5.3 Deficiencies

In this study, we pointed out a few factors which could underlie the connection between the trending of FFEs and climate change. However, there is still a lack of definitive research into the driving factors of the temporal characteristics of FFEs. Additionally, the association detected between climatic factors and FFEs is not necessarily the causation of flash flooding disasters. Our research has shown that currently there is not strong enough evidence to support whether climate change will do good or harm to the flash flooding disaster in the future. Besides, anthropogenic activities have imposed greatly complex impacts on the flash flooding disaster. On one hand, extensive reclamation of lakes and fluvial islands in the middle basin can considerably reduce the water storage and drainage capacity of watershed (Yin and Li, 2001; Zong and Chen, 2000). Meanwhile, the runoff generation potential may be improved due to the deforestation in the last decades (Khaleghi, 2017). On the other hand, the increasing energy demands calls for more hydropower projects, which can reduce flood water during flood seasons (Bai et al., 2016). And the soil conservation implementation under the guidance of the Chinese government in recent years may reduce the peak flow in summer (Liu et al., 2019b).

6 Conclusions

To reveal the spatiotemporal characteristics of flash flooding events (FFE) in China, the longest time series of FFEs was analyzed to obtain the temporal variation, temporal periodicity and temporal clustering on the national scale. Due to the huge diversity of China, a study to distinguish these detected trends were conducted in six geomorphologic regionalization (geomor-regions) during the period of 1950–2015, respectively.

1. The frequency of FFEs in China was detected to increase during 1950–2015, with more notable evidence in 2005–2010. The six geomor-regions showed the similar overall increasing trend, while each geomor-region displayed divergent patterns. Two obvious peaks, 1998 and 2010, were identified to be closely related to the precipitation anomalies causing by the EASM and El Niño Modoki.
2. Approximately one third watersheds showed the significant upward trends in the period of 1950–2015. The most striking upward trends were detected in SWM, while the downward trend was only found in the east of EP. What's more, the changing magnitude of FFEs frequency were more significant in SEM and SWM.
3. On the large scale, 12–25a was identified as the main periodicity, with three oscillation periods, and tend to be stable since 1980. The most obvious temporal scale is 16–22a. On the small scales, the 2–8a time scale is prominent, with two oscillation periods, and tend to be stable since 2006, and 2–6a is another obvious temporal scale, which was concentrated after 2010. On the characteristic temporal scales of 19a, the average period was about six years, and the rich-poor periods alternate frequently with five prominent periodic oscillatory features. The obvious period of FFEs can be detected in most geomor-regions, except TP. EP, SEM and SWM follow the similar evolution periodic pattern, while, NCP, NWB and TP show the diverse variation periods respectively. On the large scale, the main periodicity characteristics in EP, SEM and SWM are approximately 12–25a, and tend to be stable since 1980. In NCP, the alternative 10–25a periodicity of FFEs can be detected all over the period of 1950–2015. In NWB, the 10–22a periodicity started since 1975.
4. The intra-annual trends in six geomor-regions showed the similar variation pattern, and the frequency distribution can be divided into right-skew, left-skew and symmetry. The inter-annual clustering played the dominant role in FFEs occurrence across China, while the under-dispersions were only detected in 5% out of all watersheds.

设置了格式: 字体: (默认) Times New Roman, (中文) Times New Roman

设置了格式: 字体: (默认) Times New Roman, (中文) Times New Roman

By and large, the research can be considered as a contribution towards advancing the acknowledge of spatiotemporal differentiation of the flash flooding disasters. For the diversity of China, the results obtained in this paper will be helpful in gaining the better understanding of various generation mechanisms of flash flooding on the national scale. The findings of temporal pattern of FFEs in this study give ~~the~~ new insights on the temporal period, seasonality and clustering of FFEs response to the global change in the long run. Besides, the results suggest that the temporal variations were closely related to the climatic variations and anthropogenic activities in China.

**Author contribution:** Nan Wang and Weiming Cheng conceived and designed the experiments; Nan Wang and Min Zhao performed the experiments; Nan Wang and Qiangyi Liu analyzed the data; Nan Wang and Weiming Cheng wrote the paper; Jing Wang and Dongcheng Liu revised the paper.

**Acknowledgements:** This work was supported by the China National Flash Flood Disaster Prevention and Control Project. The authors are grateful for financial support from the China Institute of Water Resources and Hydropower Research (IWHR), grant number No. SHZH-IWHR-57 and National Natural Science Foundation of China, grant number No. 41571388.

**Conflicts of Interest:** The authors declare no conflict of interest.

## References

- Bai, P., Liu, X., Liang, K. and Liu, C.: Investigation of changes in the annual maximum flood in the Yellow River basin, China, *Quaternary International*, 392, 168–177, doi:10.1016/j.quaint.2015.04.053, 2016.
- Barnston, A. G. and Livezey, R. E.: Classification, ~~S~~seasonality and ~~P~~ersistence of ~~L~~low-~~F~~frequency ~~A~~atmospheric ~~C~~irculation ~~P~~patterns, *Mon. Wea. Rev.*, 115(6), 1083–1126, doi:10.1175/1520-0493(1987)115<1083:CSAPOL>2.0.CO;2, 1987.
- Beniston, M., Stoffel, M. and Hill, M.: Impacts of climatic change on water and natural hazards in the Alps: Can current water governance cope with future challenges? Examples from the European “ACQWA” project, *Environmental Science & Policy*, 14(7), 734–743, doi:10.1016/j.envsci.2010.12.009, 2011.
- Blöschl, G., Hall, J., Parajka, J., Perdigão, R. A. P., Merz, B., Arheimer, B., Aronica, G. T., Bilibashi, A., Bonacci, O., Borga, M., Čanjevac, I., Castellarin, A., Chirico, G. B., Claps, P., Fiala, K., Frolova, N., Gorbachova, L., Gül, A., Hannaford, J., Harrigan, S., Kireeva, M., Kiss, A., Kjeldsen, T. R., Kohnová, S., Koskela, J. J., Ledvinka, O., Macdonald, N., Mavrova-Guirguinova, M., Mediero, L., Merz, R., Molnar, P., Montanari, A., Murphy, C., Osuch, M., Ovcharuk, V., Radevski, I., Rogger, M., Salinas, J. L., Sauquet, E., Šraj, M., Szolgay, J., Viglione, A., Volpi, E., Wilson, D., Zaimi, K. and Živković, N.: Changing climate shifts timing of European floods, *Science*, 357(6351), 588–590, doi:10.1126/science.aan2506, 2017.
- Borga, M., Anagnostou, E. N., Blöschl, G. and Creutin, J.-D.: Flash flood forecasting, warning and risk management: the HYDRATE project, *Environmental Science & Policy*, 14(7), 834–844, doi:10.1016/j.envsci.2011.05.017, 2011.

Cunderlik, J. M., Ouarda, T. B. M. J. and Bobée, B.: On the objective identification of flood seasons, *Water Resources Research*, 40(1), doi:10.1029/2003WR002295, 2004.

Donat, M. G., Alexander, L. V., Yang, H., Durre, I., Vose, R., Dunn, R. J. H., Willett, K. M., Aguilar, E., Brunet, M., Caesar, J., Hewitson, B., Jack, C., Klein Tank, A. M. G., Kruger, A. C., Marengo, J., Peterson, T. C., Renom, M., Oria Rojas, C., Rusticucci, M., Salinger, J., Elrayah, A. S., Sekele, S. S., Srivastava, A. K., Trewin, B., Villarroel, C., Vincent, L. A., Zhai, P., Zhang, X. and Kitching, S.: Updated analyses of temperature and precipitation extreme indices since the beginning of the twentieth century: The HadEX2 dataset, *Journal of Geophysical Research: Atmospheres*, 118(5), 2098–2118, doi:10.1002/jgrd.50150, 2013.

Feng, J., Chen, W., Tam, C.-Y. and Zhou, W.: Different impacts of El Niño and El Niño Modoki on China rainfall in the decaying phases, *International Journal of Climatology*, 31(14), 2091–2101, doi:10.1002/joc.2217, 2011.

Hall, J. and Blöschl, G.: Spatial patterns and characteristics of flood seasonality in Europe, *Hydrology and Earth System Sciences*, 22(7), 3883–3901, doi:https://doi.org/10.5194/hess-22-3883-2018, 2018.

Huang, R., Chen, J. and Huang, G.: Characteristics and variations of the East Asian monsoon system and its impacts on climate disasters in China, *Adv. Atmos. Sci.*, 24(6), 993–1023, doi:10.1007/s00376-007-0993-x, 2007.

Ishak, E. H., Rahman, A., Westra, S., Sharma, A. and Kuczera, G.: Evaluating the non-stationarity of Australian annual maximum flood, *Journal of Hydrology*, 494, 134–145, doi:10.1016/j.jhydrol.2013.04.021, 2013.

Kendall, M. G.: Rank correlation methods, Griffin, Oxford, England., 1948.

Khaleghi, M. R.: The influence of deforestation and anthropogenic activities on runoff generation, *Journal of Forest Science*, 63 (2017)(No. 6), 245–253, doi:10.17221/130/2016-JFS, 2017.

Khare, S., Bonazzi, A., Mitás, C. and Jewson, S.: Modelling clustering of natural hazard phenomena and the effect on re/insurance loss perspectives, *Natural Hazards and Earth System Sciences*, 15(6), 1357–1370, doi:https://doi.org/10.5194/nhess-15-1357-2015, 2015.

Kleinen, T. and Petschel-Held, G.: Integrated assessment of changes in flooding probabilities due to climate change, *Climatic Change*, 81(3), 283–312, doi:10.1007/s10584-006-9159-6, 2007.

Li, C., Tian, Q., Yu, R., Zhou, B., Xia, J., Burke, C., Dong, B., Tett, S. F. B., Freychet, N., Lott, F. and Ciavarella, A.: Attribution of extreme precipitation in the lower reaches of the Yangtze River during May 2016, *Environ. Res. Lett.*, 13(1), 014015, doi:10.1088/1748-9326/aa9691, 2018.

Liu, J. and Zhang, Y.: Multi-temporal clustering of continental floods and associated atmospheric circulations, *Journal of Hydrology*, 555, 744–759, doi:10.1016/j.jhydrol.2017.10.072, 2017.

Liu, L., Ning, L., Liu, J., Yan, M. and Sun, W.: Prediction of summer extreme precipitation over the middle and lower reaches of the Yangtze River basin, *International Journal of Climatology*, 39(1), 375–383, doi:10.1002/joc.5813, 2019a.

Liu, S., Huang, S., Xie, Y., Wang, H., Leng, G., Huang, Q., Wei, X. and Wang, L.: Identification of the Non-stationarity of Floods: Changing Patterns, Causes, and Implications, *Water Resour Manage*, 33(3), 939–953, doi:10.1007/s11269-018-2150-y, 2019b.

Liu, Y., Yang, Z., Huang, Y. and Liu, C.: Spatiotemporal evolution and driving factors of China's flash flood disasters since 1949, *Sci. China Earth Sci.*, 61(12), 1804–1817, doi:10.1007/s11430-017-9238-7, 2018.

Loo, Y. Y., Billa, L. and Singh, A.: Effect of climate change on seasonal monsoon in Asia and its impact on the variability of monsoon rainfall in Southeast Asia, *Geoscience Frontiers*, 6(6), 817–823, doi:10.1016/j.gsf.2014.02.009, 2015.

545 Lü, X., Zhang, X. and Chen, J.: The relationship between the interdecadal variability of East Asian summer monsoon's movement and the spatial distribution pattern of the summer rainfall in East China, in *Atmospheric and Environmental Remote Sensing Data Processing and Utilization III: Readiness for GEOSS*, vol. 6684, p. 66840R, International Society for Optics and Photonics., 2007.

Lu, X., Zhang, X. and Chen, J.: The ~~h~~interdecadal ~~v~~variability of ~~A~~advance and ~~R~~retreat of East Asian ~~S~~summer ~~M~~monsoon and ~~T~~heir ~~E~~ffect on the ~~R~~regional ~~R~~ainfall ~~O~~ver China, *Journal of Tropical Meteorology*; Guangzhou, 19(4), 340–348, 2013.

550 Lv, A., Qu, B., Jia, S. and Zhu, W.: Influence of three phases of El Niño–Southern Oscillation on daily precipitation regimes in China, *Hydrology and Earth System Sciences*, 23(2), 883–896, doi:https://doi.org/10.5194/hess-23-883-2019, 2019.

Ma, F., Ye, A., You, J. and Duan, Q.: 2015–16 floods and droughts in China, and its response to the strong El Niño, *Science of The Total Environment*, 627, 1473–1484, doi:10.1016/j.scitotenv.2018.01.280, 2018.

Macdonald, N. and Black, A. R.: Reassessment of flood frequency using historical information for the River Ouse at York, UK (1200–2000), *Hydrological Sciences Journal*, 55(7), 1152–1162, doi:10.1080/02626667.2010.508873, 2010.

Mailier, P. J., Stephenson, D. B., Ferro, C. A. T. and Hodges, K. I.: Serial ~~C~~clustering of ~~E~~xtratropical ~~C~~yclones, *Mon. Wea. Rev.*, 134(8), 2224–2240, doi:10.1175/MWR3160.1, 2006.

560 Mann, H. B.: Nonparametric ~~T~~ests ~~A~~gainst ~~T~~rend, *Econometrica*, 13(3), 245–259, doi:10.2307/1907187, 1945.

Mediero, L., Kjeldsen, T. R., Macdonald, N., Kohnova, S., Merz, B., Vorogushyn, S., Wilson, D., Albuquerque, T., Blöschl, G., Bogdanowicz, E., Castellarin, A., Hall, J., Kobold, M., Kriauciuniene, J., Lang, M., Madsen, H., Onuşluel Gül, G., Perdigão, R. A. P., Roald, L. A., Salinas, J. L., Toumazis, A. D., Veijalainen, N. and Þórarinnsson, Ó.: Identification of coherent flood regions across Europe by using the longest streamflow records, *Journal of Hydrology*, 528, 341–360, doi:10.1016/j.jhydrol.2015.06.016, 2015.

565 Merz, B., Nguyen, V. D. and Vorogushyn, S.: Temporal clustering of floods in Germany: Do flood-rich and flood-poor periods exist?, *Journal of Hydrology*, 541, 824–838, doi:10.1016/j.jhydrol.2016.07.041, 2016.

Ministry of Water Resources of China (MWR): *Bulletin of ~~F~~flood and ~~D~~drought ~~D~~isaster in China (in Chinese)*., 2014.

570 Peng, J., Dadson, S., Leng, G., Duan, Z., Jagdhuber, T., Guo, W. and Ludwig, R.: The impact of the Madden-Julian Oscillation on hydrological extremes, *Journal of Hydrology*, 571, 142–149, doi:10.1016/j.jhydrol.2019.01.055, 2019.

Petrow, T. and Merz, B.: Trends in flood magnitude, frequency and seasonality in Germany in the period 1951–2002, *Journal of Hydrology*, 371(1), 129–141, doi:10.1016/j.jhydrol.2009.03.024, 2009.

Qian, W., Kang, H.-S. and Lee, D.-K.: Distribution of seasonal rainfall in the East Asian monsoon region, *Theor. Appl. Climatol.*, 73(3), 151–168, doi:10.1007/s00704-002-0679-3, 2002.

575 Saharia, M., Kirstetter, P.-E., Vergara, H., Gourley, J. J. and Hong, Y.: Characterization of floods in the United States, Journal of Hydrology, 548, 524–535, doi:10.1016/j.jhydrol.2017.03.010, 2017.

[Seiler, C., Hutjes, R. W. A. and Kabat, P.: Climate variability and trends in Bolivia, J. Appl. Meteor. Climatol., 52\(1\), 130–146, doi:10.1175/JAMC-D-12-0105.1, 2012.](#)

Sen, P. K.: Estimates of the ~~R~~egression ~~C~~oefficient ~~B~~ased on Kendall's Tau, Journal of the American Statistical Association, 63(324), 1379–1389, doi:10.1080/01621459.1968.10480934, 1968.

580 Shahid, S.: Trends in extreme rainfall events of Bangladesh, Theor Appl Climatol, 104(3), 489–499, doi:10.1007/s00704-010-0363-y, 2011.

[Si, D. and Ding, Y.: Oceanic forcings of the interdecadal variability in East Asian summer rainfall, J. Climate, 29\(21\), 7633–7649, doi:10.1175/JCLI-D-15-0792.1, 2016.](#)

585 Smith, B. K. and Smith, J. A.: The ~~F~~lashiest ~~W~~atersheds in the ~~C~~ontiguous United States, J. Hydrometeor., 16(6), 2365–2381, doi:10.1175/JHM-D-14-0217.1, 2015.

Tian, B. and Fan, K.: Factors favorable to frequent extreme precipitation in the upper Yangtze River Valley, Meteorol Atmos Phys, 121(3), 189–197, doi:10.1007/s00703-013-0261-9, 2013.

Torrence, C. and Compo, G. P.: A ~~P~~practical ~~G~~uide to ~~W~~avelet ~~A~~analysis, Bull. Amer. Meteor. Soc., 79(1), 61–78, doi:10.1175/1520-0477(1998)079<0061:APGTWA>2.0.CO;2, 1998.

590 Wang, Q., Li, S., Fu, J. and Li, G.: Formation of the anomalous summer precipitation in east China in 2010 and 1998: A comparison of the impacts of two kinds of El Niño, Acta Meteorol Sin, 26(6), 665–682, doi:10.1007/s13351-012-0601-6, 2012.

Wirtz, A., Kron, W., Löw, P. and Steuer, M.: The need for data: natural disasters and the challenges of database management, Nat Hazards, 70(1), 135–157, doi:10.1007/s11069-012-0312-4, 2014.

595 [Xiao, M., Zhang, Q. and Singh, V. P.: Influences of ENSO, NAO, IOD and PDO on seasonal precipitation regimes in the Yangtze River basin, China, International Journal of Climatology, 35\(12\), 3556–3567, doi:10.1002/joc.4228, 2015.](#)

Yin, H. and Li, C.: Human impact on floods and flood disasters on the Yangtze River, Geomorphology, 41(2), 105–109, doi:10.1016/S0169-555X(01)00108-8, 2001.

Yuan, Y., Gao, H., Li, W., Liu, Y., Chen, L., Zhou, B. and Ding, Y.: The 2016 summer floods in China and associated physical mechanisms: A comparison with 1998, J Meteorol Res, 31(2), 261–277, doi:10.1007/s13351-017-6192-5, 2017.

600 Zhang, Q., Xiao, M., Singh, V. P. and Chen, Y. D.: Max-stable based evaluation of impacts of climate indices on extreme precipitation processes across the Poyang Lake basin, China, Global and Planetary Change, 122, 271–281, doi:10.1016/j.gloplacha.2014.09.005, 2014.

Zhang, Q., Gu, X., Singh, V. P., Shi, P. and Sun, P.: More frequent flooding? Changes in flood frequency in the Pearl River basin, China, since 1951 and over the past 1000 years, Hydrology and Earth System Sciences, 22(5), 2637–2653, doi:https://doi.org/10.5194/hess-22-2637-2018, 2018.

Zhang, R.: Changes in East Asian summer monsoon and summer rainfall over eastern China during recent decades, Sci. Bull., 60(13), 1222–1224, doi:10.1007/s11434-015-0824-x, 2015.

Zhao, P., Yang, S. and Yu, R.: Long-Term Changes in Rainfall over Eastern China and Large-Scale Atmospheric Circulation Associated with Recent Global Warming, J. Climate, 23(6), 1544–1562, doi:10.1175/2009JCLI2660.1, 2010.

Zhong, Y., Lei, L., Liu, Y., Hao, Y., Zou, C. and Zhan, H.: The influence of large-scale climate phenomena on precipitation in the Ordos Basin, China, Theor Appl Climatol, 130(3), 791–805, doi:10.1007/s00704-016-1904-9, 2017.

Zhu, Y., Wang, H., Ma, J., Wang, T. and Sun, J.: Contribution of the phase transition of Pacific Decadal Oscillation to the late 1990s' shift in East China summer rainfall, Journal of Geophysical Research: Atmospheres, 120(17), 8817–8827, doi:10.1002/2015JD023545, 2015.

Zong, Y. and Chen, X.: The 1998 Flood on the Yangtze, China, Natural Hazards, 22(2), 165–184, doi:10.1023/A:1008119805106, 2000.

| Table 1 Description of the six geomor-regions in China |              |                                                                                                                                                                                                                                                                                           |
|--------------------------------------------------------|--------------|-------------------------------------------------------------------------------------------------------------------------------------------------------------------------------------------------------------------------------------------------------------------------------------------|
| Name                                                   | Abbreviation | Description                                                                                                                                                                                                                                                                               |
| Eastern Hilly Plains                                   | EP           | It located in the northern part of China comprising low terrains and the largest plain areas. Plains and platforms are dominant features of this region, which has well-developed fluvial accumulation landforms.                                                                         |
| Southeastern Low-middle Mountains                      | SEM          | It located in the southern part of the low terrain topography and is dominated by low elevation hills and low or middle relief mountains, with only 30% of its area occupied by plains and platforms.                                                                                     |
| Northern and Central Middle Mountains and Plains       | NCP          | It located in the northeastern part of China's middle terrain topography and is characterized by a plateau landform composed of low or middle relief mountains, hills, platforms, and plains. The loess landform is well developed in this region.                                        |
| Northwestern Middle and High Mountains and Basins      | NWB          | It located in the northwestern part of the middle terrain topography. It is composed of middle to high mountains, with flattened basins interposed between them, and is characterized by an arid desert geomorphology. Mountains with basins are made up of plains, platforms, and hills. |
| Southwestern Subalpine Mountains                       | SWM          | It located in the southern part of the middle terrain topography. Evidencing a typical karst landform, middle or high mountains with middle or high reliefs are widespread with wide valley basins interspersed between them.                                                             |
| Tibetan Plateau                                        | TP           | It covers China's high terrain topography. It is composed of plains and high mountains at elevations above 4000 m, accounting for three-forths of the area of this region. It is characterized by glacial and periglacial landforms.                                                      |

| Table 2 Number (percentage) of watersheds with upward/downward trends in the number of FFEs. |        |         |        |        |         |        |           |
|----------------------------------------------------------------------------------------------|--------|---------|--------|--------|---------|--------|-----------|
| Region                                                                                       | EP     | SEM     | NCP    | NWB    | SWM     | TP     | All China |
| Upward                                                                                       | 4(12%) | 13(68%) | 2(10%) | 5(28%) | 16(89%) | 3(13%) | 44(33%)   |
| Downward                                                                                     | 1(3%)  | 0(0%)   | 0(0%)  | 0(0%)  | 0(0%)   | 0(0%)  | 1(1%)     |

Table 3 FFEs characteristics of six geomor-regions identified in China

| Region | Flood-rich months | Flood-poor months  | Distribution pattern |
|--------|-------------------|--------------------|----------------------|
| EP     | July, August      | September to May   | Right-skew           |
| NCP    | June to August    | September to April | Left-skew            |
| NWB    | June to August    | September to April | Right-skew           |
| SEM    | June to August    | October to April   | Symmetry             |
| SWM    | June to August    | October to April   | Symmetry             |
| TP     | June to August    | October to April   | Right-skew           |

Table 4 Distribution of the number of FFEs within the zone of the precipitation anomalies

| Anomalies of precipitation (%) | 1998 |     |     |     |     |     | 2010 |     |     |     |     |     |
|--------------------------------|------|-----|-----|-----|-----|-----|------|-----|-----|-----|-----|-----|
|                                | May  | Jun | Jul | Aug | Sep | Oet | May  | Jun | Jul | Aug | Sep | Oet |
| <40                            | 1    | 14  | 25  | 48  | 15  | 2   | 1    | 45  | 22  | 46  | 2   | 1   |
| 40~20                          | 6    | 9   | 75  | 42  | 13  | 3   | 15   | 21  | 55  | 32  | 2   | 0   |
| 20~0                           | 30   | 39  | 209 | 29  | 9   | 3   | 22   | 32  | 66  | 54  | 19  | 24  |
| 0~20                           | 30   | 53  | 143 | 68  | 7   | 0   | 19   | 60  | 130 | 144 | 31  | 170 |
| 20~40                          | 13   | 60  | 137 | 97  | 4   | 0   | 31   | 65  | 294 | 52  | 24  | 119 |
| 40~60                          | 6    | 75  | 149 | 57  | 1   | 0   | 28   | 103 | 381 | 28  | 43  | 184 |
| 60~80                          | 9    | 107 | 133 | 67  | 1   | 1   | 31   | 161 | 457 | 11  | 13  | 283 |
| 80~100                         | 5    | 231 | 95  | 31  | 2   | 0   | 6    | 92  | 417 | 5   | 11  | 77  |
| ≥100                           | 21   | 239 | 261 | 140 | 0   | 3   | 5    | 110 | 613 | 6   | 25  | 32  |
